# Supplementary material
Source: publisher figshare collection journal article supplement (https://asha.figshare.com/articles/dataset/_/14963808)
Supplement: Supplementary file 1 [file 1]

**Supplemental Appendix E.** Syllable Counts (Adjusted) and Errors (as Proportion of Syllables) by Group and Condition

| Condition         | <i>M (SD)</i>        |              |                  |             |
|-------------------|----------------------|--------------|------------------|-------------|
|                   | Syllables/10 seconds |              | Errors/syllables |             |
|                   | AWNS                 | AWS          | AWNS             | AWS         |
| Pretest baseline  | 32.13 (6.17)         | 25.33 (6.25) | 0.01 (0.01)      | 0.01 (0.01) |
| Vigilance task    | 32.62 (6.88)         | 26.58 (7.14) | 0.01 (0.01)      | 0.01 (0.01) |
| Dual spatial      |                      |              |                  |             |
| S2                | 31.98 (6.50)         | 25.36 (7.50) | 0.01 (0.01)      | 0.01 (0.01) |
| S3                | 31.64 (7.12)         | 25.47 (7.20) | 0.01 (0.01)      | 0.01 (0.01) |
| S4                | 30.72 (7.48)         | 25.58 (7.42) | 0.01 (0.01)      | 0.01 (0.01) |
| L2                | 31.04 (7.14)         | 25.07 (7.32) | 0.01 (0.01)      | 0.01 (0.01) |
| L3                | 30.49 (6.74)         | 24.79 (7.27) | 0.01 (0.01)      | 0.01 (0.01) |
| L4                | 30.88 (6.91)         | 24.88 (7.23) | 0.01 (0.01)      | 0.01 (0.01) |
| Dual verbal       |                      |              |                  |             |
| S2                | 31.46 (6.88)         | 25.78 (7.46) | 0.01 (0.01)      | 0.01 (0.01) |
| S3                | 32.26 (7.39)         | 25.20 (7.60) | 0.01 (0.01)      | 0.01 (0.01) |
| S4                | 30.29 (7.27)         | 24.79 (7.99) | 0.01 (0.01)      | 0.01 (0.01) |
| L2                | 32.08 (6.67)         | 25.67 (8.18) | 0.01 (0.01)      | 0.01 (0.01) |
| L3                | 31.06 (6.40)         | 26.05 (8.46) | 0.01 (0.01)      | 0.01 (0.01) |
| L4                | 30.60 (7.04)         | 24.83 (8.05) | 0.01 (0.01)      | 0.01 (0.01) |
| Posttest baseline | 32.48 (6.74)         | 26.41 (7.41) | 0.01 (0.01)      | 0.01 (0.01) |

*Note.* AWNS = adults who do not stutter; AWS = adults who stutter; S = short ISI (1000 ms); L = long ISI (3000 ms); 2, 3, 4 = WM load.
