# Supplementary material
Source: publisher figshare collection journal article supplement (https://asha.figshare.com/articles/dataset/_/14963808)
Supplement: Supplementary file 2 [file 1]

# **Supplemental Appendix F. Model Fit of Sequential Multilevel Regression Models of Speech Rate**

|                                | <i>df</i> | <i>AIC</i> | <i>BIC</i> | <i>-2LL</i> | <i>X</i> <sup>2</sup> | <i>p</i> |
|--------------------------------|-----------|------------|------------|-------------|-----------------------|----------|
| M1: Baseline Model             | 3         | 47278      | 47298      | -23636      |                       |          |
| M2: Added Speaker              | 4         | 47270      | 47296      | -23631      | 10.51                 | .002     |
| M3: Added Task                 | 5         | 44575      | 44607      | -22283      | 2696.64               | < .00001 |
| M4: Added Task * Speaker       | 6         | 44528      | 44567      | -22258      | 49.11                 | < .00001 |
| M5: Added Domain * ISI * Loads | 28        | 44549      | 44731      | -22247      | 22.83                 | .42      |

*Note.* Models were fit using Maximum Likelihood Estimation and included a random intercept for each subject.
