# Supplementary material
Source: publisher figshare collection journal article supplement (https://asha.figshare.com/articles/dataset/_/14963808)
Supplement: Supplementary file 3 [file 1]

**Supplemental Appendix C.** Atypical and Typical Disfluencies (as a Proportion of Syllables) by Group and Condition

| Condition         | <i>M (SD)</i>                   |             |                                |             |
|-------------------|---------------------------------|-------------|--------------------------------|-------------|
|                   | Atypical disfluencies/syllables |             | Typical disfluencies/syllables |             |
|                   | AWNS                            | AWS         | AWNS                           | AWS         |
| Pretest baseline  | 0.01 (0.01)                     | 0.07 (0.06) | 0.04 (0.03)                    | 0.05 (0.06) |
| Vigilance task    | 0.01 (0.01)                     | 0.05 (0.06) | 0.04 (0.03)                    | 0.04 (0.05) |
| Dual spatial      |                                 |             |                                |             |
| S2                | 0.01 (0.01)                     | 0.05 (0.06) | 0.04 (0.03)                    | 0.05 (0.07) |
| S3                | 0.01 (0.01)                     | 0.04 (0.05) | 0.04 (0.03)                    | 0.05 (0.07) |
| S4                | 0.01 (0.01)                     | 0.04 (0.04) | 0.05 (0.04)                    | 0.04 (0.07) |
| L2                | 0.01 (0.01)                     | 0.04 (0.05) | 0.04 (0.03)                    | 0.05 (0.07) |
| L3                | 0.01 (0.01)                     | 0.05 (0.07) | 0.04 (0.03)                    | 0.04 (0.06) |
| L4                | 0.01 (0.01)                     | 0.05 (0.05) | 0.04 (0.03)                    | 0.05 (0.08) |
| Dual verbal       |                                 |             |                                |             |
| S2                | 0.01 (0.01)                     | 0.05 (0.05) | 0.04 (0.03)                    | 0.05 (0.06) |
| S3                | 0.01 (0.01)                     | 0.05 (0.07) | 0.04 (0.03)                    | 0.05 (0.08) |
| S4                | 0.01 (0.01)                     | 0.04 (0.05) | 0.04 (0.03)                    | 0.05 (0.09) |
| L2                | 0.01 (0.01)                     | 0.05 (0.06) | 0.04 (0.03)                    | 0.05 (0.08) |
| L3                | 0.01 (0.01)                     | 0.04 (0.07) | 0.04 (0.03)                    | 0.05 (0.07) |
| L4                | 0.01 (0.01)                     | 0.05 (0.06) | 0.04 (0.03)                    | 0.05 (0.07) |
| Posttest baseline | 0.01 (0.01)                     | 0.06 (0.07) | 0.04 (0.02)                    | 0.04 (0.05) |

*Note.* AWNS = adults who do not stutter; AWS = adults who stutter; S = short ISI (1000 ms); L = long ISI (3000 ms); 2, 3, 4 = WM load.
