# Supplementary material
Source: publisher figshare collection journal article supplement (https://asha.figshare.com/articles/dataset/_/14963808)
Supplement: Supplementary file 4 [file 1]

**Supplemental Appendix A.** Proportion of Correct Responses on Secondary Task by Group and Condition

| <i>M (SD)</i>    |             |             | <i>M (SD)</i>    |             |             |
|------------------|-------------|-------------|------------------|-------------|-------------|
| <b>Condition</b> | <b>AWNS</b> | <b>AWS</b>  | <b>Condition</b> | <b>AWNS</b> | <b>AWS</b>  |
| Baseline spatial |             |             | Dual spatial     |             |             |
| S2               | 1.00 (0.02) | 0.99 (0.02) | S2               | 0.93 (0.16) | 0.91 (0.15) |
| S3               | 0.99 (0.03) | 1.00 (0.00) | S3               | 0.87 (0.22) | 0.89 (0.14) |
| S4               | 1.00 (0.02) | 0.99 (0.05) | S4               | 0.87 (0.22) | 0.89 (0.13) |
| L2               | 1.00 (0.00) | 0.98 (0.04) | L2               | 0.83 (0.26) | 0.90 (0.15) |
| L3               | 1.00 (0.02) | 0.98 (0.04) | L3               | 0.84 (0.21) | 0.87 (0.18) |
| L4               | 1.00 (0.00) | 0.99 (0.02) | L4               | 0.83 (0.21) | 0.87 (0.20) |
| Baseline verbal  |             |             | Dual verbal      |             |             |
| S2               | 1.00 (0.02) | 0.99 (0.03) | S2               | 0.88 (0.16) | 0.85 (0.20) |
| S3               | 0.99 (0.03) | 0.98 (0.04) | S3               | 0.85 (0.16) | 0.79 (0.22) |
| S4               | 0.98 (0.04) | 0.99 (0.05) | S4               | 0.76 (0.28) | 0.75 (0.26) |
| L2               | 1.00 (0.02) | 0.99 (0.02) | L2               | 0.84 (0.21) | 0.85 (0.13) |
| L3               | 1.00 (0.00) | 0.99 (0.03) | L3               | 0.77 (0.24) | 0.74 (0.23) |
| L4               | 0.99 (0.04) | 0.99 (0.03) | L4               | 0.76 (0.27) | 0.76 (0.21) |

*Note.* AWNS = adults who do not stutter; AWS = adults who stutter; S = short ISI (1000 ms); L = long ISI (3000 ms); 2, 3, 4 = WM loads.
