# Supplementary material
Source: publisher figshare collection journal article supplement (https://asha.figshare.com/articles/dataset/_/14963808)
Supplement: Supplementary file 6 [file 1]

**Supplemental Appendix G.** Model Fit of Sequential Multilevel Negative Binomial Regression Models of Speech Errors

|                                | <i>df</i> | <i>AIC</i> | <i>BIC</i> | <i>−2LL</i> | $\chi^2$ | <i>p</i> |
|--------------------------------|-----------|------------|------------|-------------|----------|----------|
| M1: Baseline Model             | 3         | 10089      | 10109      | −5042       |          |          |
| M2: Added Speaker              | 4         | 10090      | 10116      | −5041       | 1.34     | .25      |
| M3: Added Task                 | 5         | 10092      | 10124      | −5041       | 0.15     | .70      |
| M4: Added Speaker * Task       | 6         | 10093      | 10132      | −5041       | 0.60     | .44      |
| M5: Added Domain * ISI * Loads | 28        | 10114      | 10297      | −5029       | 22.78    | .41      |

*Note.* Models were fit using Maximum Likelihood Estimation, were offset by number of syllables spoken, and included a random intercept for each subject.
