# Supplementary material
Source: publisher figshare collection journal article supplement (https://asha.figshare.com/articles/dataset/_/14963808)
Supplement: Supplementary file 7 [file 1]

**Supplemental Appendix B. Model Fit of Sequential Multilevel Logistic Regression Model of Secondary Task Performance**

|                                                                                 | <i>df</i> | <i>AIC</i> | <i>BIC</i> | <i>-2LL</i> | <i>X</i> <sup>2</sup> | <i>p</i> |
|---------------------------------------------------------------------------------|-----------|------------|------------|-------------|-----------------------|----------|
| M1: Individual Intercept Only                                                   | 2         | 4963       | 4977       | 2479        |                       |          |
| M2: Added Task effect                                                           | 3         | 4039       | 4060       | 2016        | 926.12                | < .0001  |
| M3: Added Speaker                                                               | 4         | 4040       | 4069       | 2016        | 0.18                  | .67      |
| M4: Added Task * Speaker                                                        | 5         | 4039       | 4075       | 2014        | 3.05                  | .08      |
| M5: Added Domain                                                                | 6         | 3982       | 4025       | 1985        | 59.72                 | < .0001  |
| M6: Added Task * Domain * Speaker                                               | 9         | 3982       | 4046       | 1982        | 5.96                  | .11      |
| M7: Added ISI                                                                   | 10        | 3975       | 4047       | 1977        | 8.38                  | .004     |
| M8: Task * Speaker * Domain * ISI                                               | 17        | 3977       | 4099       | 1971        | 11.91                 | .10      |
| M9: Added Load1 & Load2                                                         | 19        | 3950       | 4086       | 1956        | 31.24                 | < .0001  |
| M10: Added full interactions (Task * Domain * ISI * Load1 & Load2)              | 49        | 3980       | 4330       | 1941        | 30.61                 | .43      |
| M11: Task + Domain + ISI + Load1 + Load2 (removed Speaker and all interactions) | 7         | 3948       | 3998       | 1967        | 21.39 <sup>a</sup>    | .045     |

*Note.* Logistic models were fit using Maximum Likelihood Estimation and included a random intercept for each subject.

<sup>a</sup>Compares M9 to M11.
